# Supplementary material
Source: publisher site journal article supplement (https://www.dovepress.com/article/377924)
Supplement: Supplementary file 1 [file get_supplementary_file.php]

# SUPPLEMENTARY DATA TABLES

1. Sample Characteristics

|  | **Adult caregivers of  ages 13-17**  **n/6 (%)** | | **Adolescent patients ages 13-17**  **n/6 (%)** | | **Adult patients  ages 18+**  **n/11 (%)** |
| --- | --- | --- | --- | --- | --- |
| **Sex of individual** | | | | | |
| Male | 1 (16.7%) | 4 (66.7%) | | | 1 (9.1%) |
| Female | 5 (83.3%) | 2 (33.3%) | | | 10 (90.9%) |
| **Caregivers with sickle cell disease** | | | | | |
|  | 1 (16.7%) | |  | |  |
| **Ethnicity** | | | | | |
| Black/African American | 5 (83.3%) | | 5 (83.3%) | | 11 (100%) |
| Caucasian |  | |  | |  |
| Other | 1 (16.7%) | | 1 (16.7%) | |  |
| **Education** | | | | | |
| Associates | 4 (66.7%) | | |  |  |
| Bachelor’s college | 2 (33.3%) | | |  | 8 (72.8%) |
| Did not complete high school* |  | | | 4 (66.7%) |  |
| Some college |  | | | 1 (16.7%) | 1 (9.1%) |
| High school diploma or equivalent (GED) |  | | | 1 (16.7%) | 1 (9.1%) |
| Doctoral or professional degree |  | | |  | 1 (9.1%) |
| Master’s |  | | |  |  |
| **Employment** | | | | | |
| Full time | 3 (50%) | | |  | 5 (45.4%) |
| Part time** | 1 (16.7%) | | | 1 (16.7%) | 3 (27.2%) |
| Retired |  | | |  | 1 (9.1%) |
| Unemployed | 1 (16.7%) | | |  | 1 (9.1%) |
| Student* |  | | | 6 (100%) | 2 (18.2%) |
| Self-employed | 1 (16.7%) | | |  |  |
| **Marital status** | | | | | |
| Married | 2 (33.3%) | | |  | 2 (18.2%) |
| Partnership |  | | |  | 1 (9.1%) |
| Single | 4 (66.7%) | | |  | 8 (72.8%) |

*The adolescent patients who did not complete high school were either still in middle school or were currently attending high school.

**One adult patient and one adolescent patient noted they were simultaneously a student and working part time.

1. Clinical Characteristics

|  | **Dyads of Adult caregivers of  ages 13-17**  **n/6 (%)** | **Adult patients  ages 18+**  **n/11 (%)** |
| --- | --- | --- |
| **How would you rate the severity of you or your child’s SCD? [n,%]** | | |
| 1 (very mild) |  |  |
| 2 (mild) |  |  |
| 3 (moderate) | 3 (50%) | 4 (36.4%) |
| 4 (severe) | 1 (12.7%) | 7 (63.7%) |
| 5 (very severe) | 2 (33.3%) |  |
| **How many VOC episodes have you or your child experienced since your SCD diagnosis? [n,%]** | | |
| 0-20 | 2 (33.3%) | 5 (45.4%) |
| 21-40 |  | 2 (18.2%) |
| 41-60 |  | 3 (27.2%) |
| 100+/too many to count | 4 (66.7%) | 1 (9.1%) |
| **How many VOC episodes have you or your child experienced in the last 6 months? [n,%]** | | |
| 1 | 1 (12.7%) | 2 (18.2%) |
| 2 | 1 (12.7%) | 3 (27.2%) |
| 3 |  | 2 (18.2%) |
| 4 | 1 (12.7%) | 2 (18.2%) |
| 5+ | 3 (50%) | 2 (18.2%) |
| **What body part do you or your child most frequently experience pain? [n, %]** | | |
| Back | 2 (33.3%) | 4 (36.4%) |
| Leg | 5 (100%) | 4 (36.4%) |
| Shoulders |  | 2 (18.2%) |
| Knees |  | 2 (18.2%) |
| Hips |  | 2 (18.2%) |
| Bones |  | 2 (18.2%) |
| Chest | 2 (33.3%) |  |
| Lungs |  | 1 (9.1%) |
| Joints |  | 1 (9.1%) |
| Arms | 2 (33.3%) | 1 (9.1%) |
| Headaches | 1 (12.7%) | 1 (9.1%) |
| Tummy ache |  | 1 (9.1%) |
| Everywhere |  | 1 (9.1%) |
| **Alternately, how often do you or your child experience a VOC episode? [n,%]** | | |
| Often | 1 (12.7%) | 7 (63.7%) |
| Quite often | 1 (12.7%) |  |
| Very often |  | 3 (27.2%) |
| Every 2 weeks | 1 (12.7%) | 1 (9.1%) |
| Almost every month | 2 (33.3%) |  |
| 3-5 times a month | 1 (12.7%) |  |
| **For each VOC episode, what is the likelihood that you or your child will go to the ER to be treated? (approximately) [n,%]** | | |
| Very low (1 out of 12) |  | 1 (9.1%) |
| Rare or 5% | 4 (66.7%) |  |
| Very low | 1 (12.7%) |  |
| Sometimes | 1 (12.7%) |  |
| Likely |  | 8 (72.7%) |
| Very likely |  | 2 (18.2%) |
| **What medications or other treatments are you or your child CURRENTLY receiving for SCD? [n,%]** | | |
| Hydroxyurea* | 3 (50%) | 6 (54.5%) |
| Folic Acid | 3 (50%) | 7 (63.7%) |
| Blood transfusions | 1 (12.7%) | 1 (9.1%) |
| All natural |  | 1 (9.1%) |
| Indomethacin |  | 1 (9.1%) |
| Rescue treatments** | 4 (66.7%) | 4 (36.4%) |

*Three patients shared they used to take hydroxyurea*

**Rescue treatments are treatments taken as needed during a crisis. They included: morphine, hydromorphone, codeine, naproxen, ibuprofen, acetaminophen, and indomethacin**

1. Symptom Experience

| **Symptom** | **n/23 (%)** |
| --- | --- |
| **Pain (all locations noted below)** | 13 (56.5%) |
| Aches and pains everyday | 5 (21.7%) |
| Legs | 3 (13.0%) |
| Joints | 3 (13.0%) |
| Arms | 3 (13.0%) |
| Hands | 3 (13.0%) |
| Back | 3 (13.0%) |
| Knees | 2 (8.7%) |
| Hips | 2 (8.7%) |
| Shoulder blades | 2 (8.7%) |
| Bones | 2 (8.7%) |
| Chest | 2 (8.7%) |
| General pain (non-specified) | 1 (4.3%) |
| Arms | 1 (4.3%) |
| While urinating | 1 (4.3%) |
| **Fatigue** | 11 (47.8%) |
| **Dehydration** | 8 (34.8%) |
| **Acute chest syndrome** | 6 (26.1%) |
| **Fever** | 5 (21.7%) |
| **Inflammation** | 3 (13.0%) |
| **Headache** | 3 (13.0%) |
| **Yellow eyes** | 2 (8.7%) |
| **Stomach cramps** | 2 (8.7%) |
| **Pneumonia** | 1 (4.3%) |
| **Ulcers in mouth** | 1 (4.3%) |
| **Acid reflux** | 1 (4.3%) |
| **Heart racing** | 1 (4.3%) |
| **Restless leg syndrome** | 1 (4.3%) |
| **Dehydration** | 1 (4.3%) |
| **Changes in body temperature/sweating** | 1 (4.3%) |
| **Hot flashes** | 1 (4.3%) |
| **Infection of the skull bone** | 1 (4.3%) |
| **Swollen eyes** | 1 (4.3%) |
| **Vomiting** | 1 (4.3%) |

1. Ranking Exercise

| **n/23 (%)** | **No ranking given** | **1st most important** | **2nd most important** | **3rd most important** |
| --- | --- | --- | --- | --- |
| Reducing symptoms/effective treatment | 1 (4.3%) | 6 (26.0%) | 3 (13.0%) |  |
| Receiving proper treatment in timely fashion |  | 1 (4.3%) | 3 (13.0%) |  |
| Knowledgeable doctor | 3 (13.0%) | 2 (8.7%) | 3 (13.0%) | 2 (8.7%) |
| No side effects |  | 2 (8.7%) | 1 (4.3%) | 1 (4.3%) |
| No hospital visits | 1 (4.3%) |  |  |  |
| Hospital factors* | 6 (26.0%) | 3 (13.0%) |  | 1 (4.3%) |
| Cost | 1 (4.3%) | 1 (4.3%) | 1 (4.3%) | 2 (8.7%) |
| Employers accommodating SCD patients | 1 (4.3%) |  | 1 (4.3%) | 1 (4.3%) |
| Educating others about SCD |  |  | 1 (4.3%) |  |
| No complications from treatment/good quality of life | 3 (13.0%) |  | 2 (8.7%) |  |
| Access to innovative treatment |  |  |  | 1 (4.3%) |

*Hospital factors include a protocol in place, patients feeling comfortable upon admission, patients feeling as if they are taken seriously and not looked at as a drug seeker, and if the hospital offers any kind of support system for patients struggling with a pain crisis
